# Supplementary material
Source: publisher site journal article supplement (https://www.dovepress.com/article/503902)
Supplement: Supplementary file 1 [file get_supplementary_file.php]

**Table S1. Correlation analysis between factors and pain-VAS**

| Factors | r***** | *P* values |
| --- | --- | --- |
| Age | 0.028 | 0.582 |
| Sex |  |  |
| Female | -0.052 | 0.300 |
| BMI | 0.035 | 0.483 |
| Smoking | -0.015 | 0.761 |
| Drinking | 0.020 | 0.688 |
| Duration | -0.107 | **0.034** |
| Educational level |  |  |
| High level | 0.054 | 0.284 |
| Employment |  |  |
| Professional work | -0.039 | 0.439 |
| Daily physical activity |  |  |
| Low level | -0.006 | 0.911 |
| Comorbidity with OA | 0.267 | **＜0.001** |
| FIQR | 0.530 | **＜0.001** |
| PSS | 0.607 | **＜0.001** |
| BDI | 0.380 | **＜0.001** |
| BAI | 0.520 | **＜0.001** |
| SF-36 | 0.061 | 0.229 |
| FS-14 | 0.599 | **＜0.001** |
| SCL scores | 0.522 | **＜0.001** |
| PSQI | 0.102 | **0.043** |

***** r represents the correlation coefficient.

The presence of statistical significance is indicated by bolded *P* values.

Abbreviations: VAS, Visual Analogue Scale; BMI, Body Mass Index; OA, Osteoarthritis; FIQR, The Revised Fibromyalgia Impact Questionnaire; PSS, Perceived Stress Scale; BDI, Beck Depression Inventory; BAI, Beck Anxiety Inventory; SF-36, Medical Outcomes Study Short Form Health Survey; FS-14, Fatigue Scale-14; SCL, Symptom Checklist; PSQI, Pittsburgh Sleep Quality Index.

**Table S2. Interactive analysis of OA and degree of fatigue (FS-14)△**

|  | Multiplicative interaction |  | Additive interaction | | | | |
| --- | --- | --- | --- | --- | --- | --- | --- |
|  | OR (95%*CI*) |  | RERI |  | AP |  | SI |
| OA and FS-14 | 1.265 (1.201–1.333) |  | 0.929 (−0.270–2.123) |  | 0.169 (0.077–0.261) |  | 1.261 (1.034–1.539) |

**△** Based on multivariable logistic regression model 2.

Abbreviations: OA, Osteoarthritis; FS-14, Fatigue Scale-14; OR, Odds Ratio; RERI, relative excess risk due to interaction; AP, attributable proportion due to interaction; SI, synergy index.

**Figure S1. Flow chart**


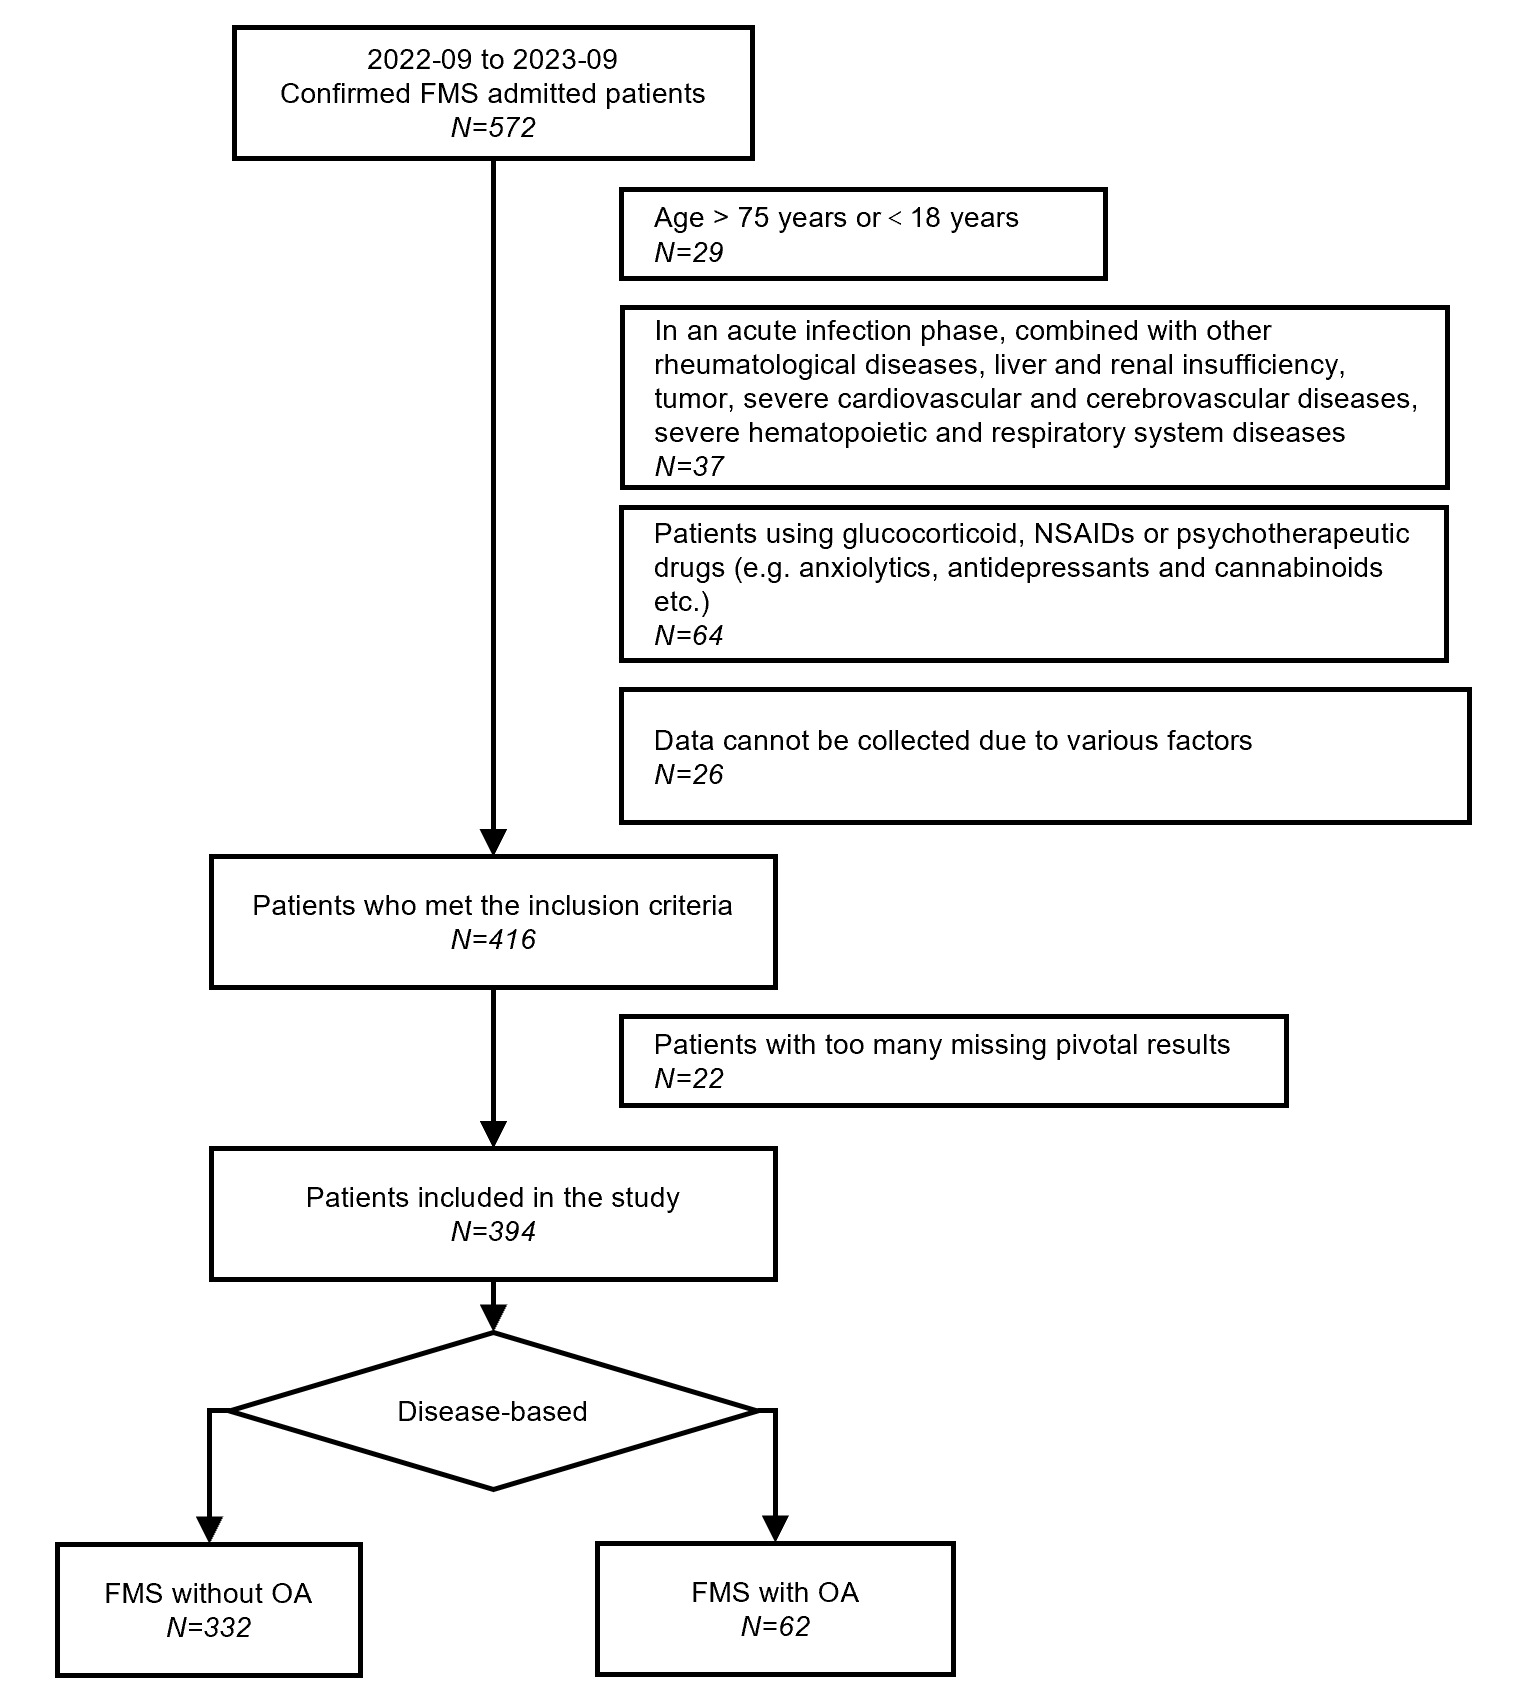


Abbreviations: FMS, fibromyalgia syndrome; NSAIDs, non-steroidal anti-inflammatory drugs; OA, osteoarthritis.
